# Supplementary material for: A Combined Plasmonic and Electrochemical Aptasensor Based on Gold Nanopit Arrays for the Detection of Human Serum Albumin
Source: MDPI journal article supplement (doi:10.3390/nano13162374), 2023-08-19
Supplement: s1 [file s1]

# A Combined Plasmonic and Electrochemical Aptasensor Based on Gold Nanopit Arrays for the Detection of Human Serum Albumin

Ruifeng Zhu<sup>1,2</sup>, Gabriela Figueroa-Miranda<sup>1</sup>, Lei Zhou<sup>1</sup>, Ziheng Hu<sup>1</sup>, Bohdan Lenyk<sup>1,3</sup>,  
Sven Ingebrandt<sup>2</sup>, Andreas Offenhäusser<sup>1</sup>, and Dirk Mayer <sup>\*1</sup>

<sup>1</sup> *Institute of Biological Information Processing, Bioelectronics (IBI-3), Forschungszentrum  
Jülich GmbH, 52428 Jülich, Germany*

<sup>2</sup> *Institute of Materials in Electrical Engineering 1, RWTH Aachen University, 52074  
Aachen, Germany*

<sup>3</sup> *Department of Physics, University of Konstanz, 78457 Konstanz, Germany*

---

\*Corresponding author, email: dirk.mayer@fz-juelich.de

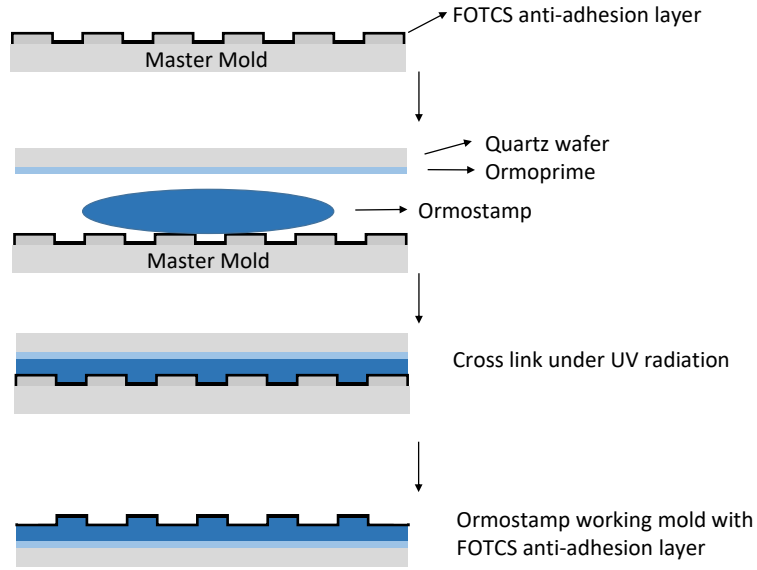

Figure S1: Fabrication process of the working mold.

Table S1: Ormopriime datasheets.

| Ormopriime            |              |
|-----------------------|--------------|
| Spin coating          |              |
| spin speed [rpm]:     | 4000         |
| time [s]:             | 60           |
| acceleration [rpm/s]: | 1000         |
| hardbake [°C]:        | 150          |
| time [min]:           | 5            |
| film thickness [nm]:  | $130 \pm 15$ |

Table S2: Dry etching parameters.

| Cr etch recipe             |            | Au etch recipe           |            |
|----------------------------|------------|--------------------------|------------|
| Cl <sub>2</sub> gas flow   | 50 sccm    | Cl <sub>2</sub> gas flow | 15 sccm    |
| O <sub>2</sub> gas flow    | 3 sccm     | Ar gas flow              | 5 sccm     |
| RF power                   | 150 W      | RF power                 | 50 W       |
| ICP power                  | 0 W        | ICP power                | 800 W      |
| Chamber pressure           | 0.09 Torr  | Chamber pressure         | 0.007 Torr |
| Temperature                | 30 °C      | Temperature              | 50 °C      |
| Etching rate for mr-NIL200 | 176 nm/min | Etching rate for Cr      | 13 nm/min  |
| Etching rate for Cr        | 39 nm/min  | Etching rate for Au      | 72 nm/min  |
| Selectivity (mr-NIL200/Cr) | 4.51       | Selectivity (Cr/Au)      | 0.18       |

Table S3: Performance comparison of various strategies for HSA detection.

| Biosensor structure or surface modification                 | Method                                           | Dynamic range of detection               | Limit of detection      | Reference |
|-------------------------------------------------------------|--------------------------------------------------|------------------------------------------|-------------------------|-----------|
| Single-walled carbon nanotube with antibodies               | FET biosensors                                   | 1 fg/mL - 10 pg/mL                       | 0.47 fg/mL              | [1]       |
| Gold nanoclusters capped glutathione as a fluorescent probe | Fluorescence                                     | 6 $\mu$ M - 338 $\mu$ M                  | 4 $\mu$ M               | [2]       |
| CuInZnS quantum dots-Co <sup>2+</sup> sensing system        | Photoluminescence                                | 75 nM - 100 $\mu$ M                      | 48 nM                   | [3]       |
| Cabergoline-HSA interactions                                | Amperometric method                              | 1 - 40 $\mu$ M                           | 0.6 $\mu$ M             | [4]       |
| Curcumin embedded in bacterial cellulose nanopaper          | Naked eye / Smartphone camera by optical sensing | 10 - 300 $\mu$ M / 25 - 400 $\mu$ M      | 5 $\mu$ M / 5 $\mu$ M   | [5]       |
| Gold nanopit arrays with HSA aptamer                        | Plasmonic / Electrochemical aptasensor           | 100 - 600 $\mu$ M / 0.1 nM - 600 $\mu$ M | 95.22 $\mu$ M / 0.08 nM | This work |

Table S4: Results of the detection of HSA in human serum by standard addition method.

| 1% Human Serum | Spiked  | Measured  |                 | Recovery  |                 | RSD       |                 |
|----------------|---------|-----------|-----------------|-----------|-----------------|-----------|-----------------|
| Sample         | $\mu$ M | Plasmonic | Electrochemical | Plasmonic | Electrochemical | Plasmonic | Electrochemical |
| 1              | 0       | -         | 5.54            | -         | -               | -         | 12.54%          |
| 2              | 100     | 100.58    | 87.67           | 95.30%    | 83.07%          | 12.76%    | 4.12%           |
| 3              | 200     | 177.15    | 163.95          | 86.19%    | 79.77%          | 28.38%    | 5.68%           |

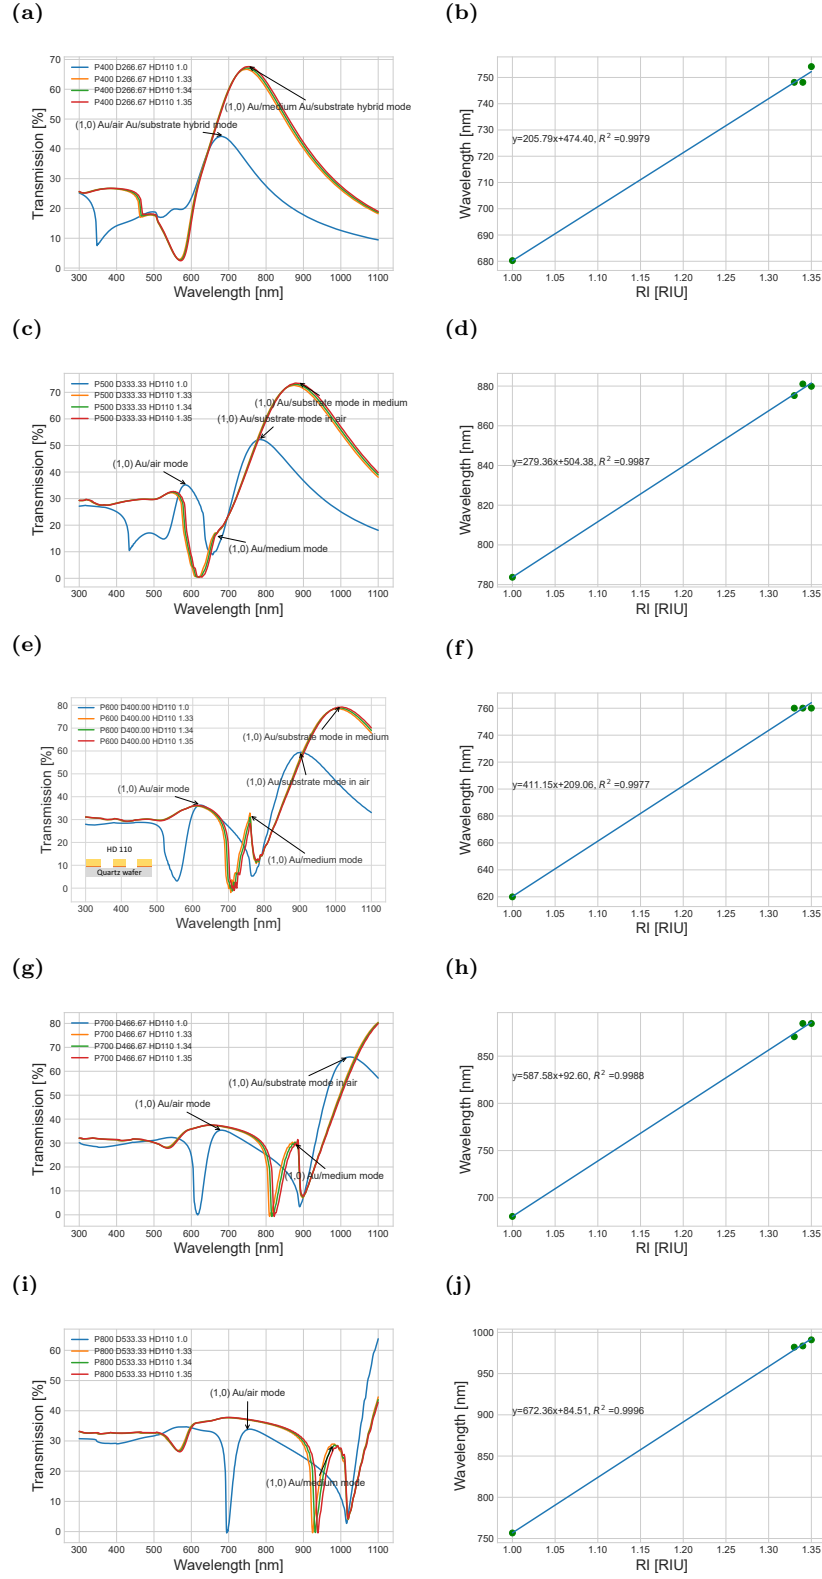

Figure S2: FDTD simulation spectrum of the fully penetrating AuNhA with different periodicity (Periodicity/Diameter = 1.5) and corresponding refractive index sensitivity of the (1,0) Au/medium mode including 400 nm (a, b), 500 nm (c, d), 600 nm (e, f), 700 nm (g, h), and 800 nm (i, j).

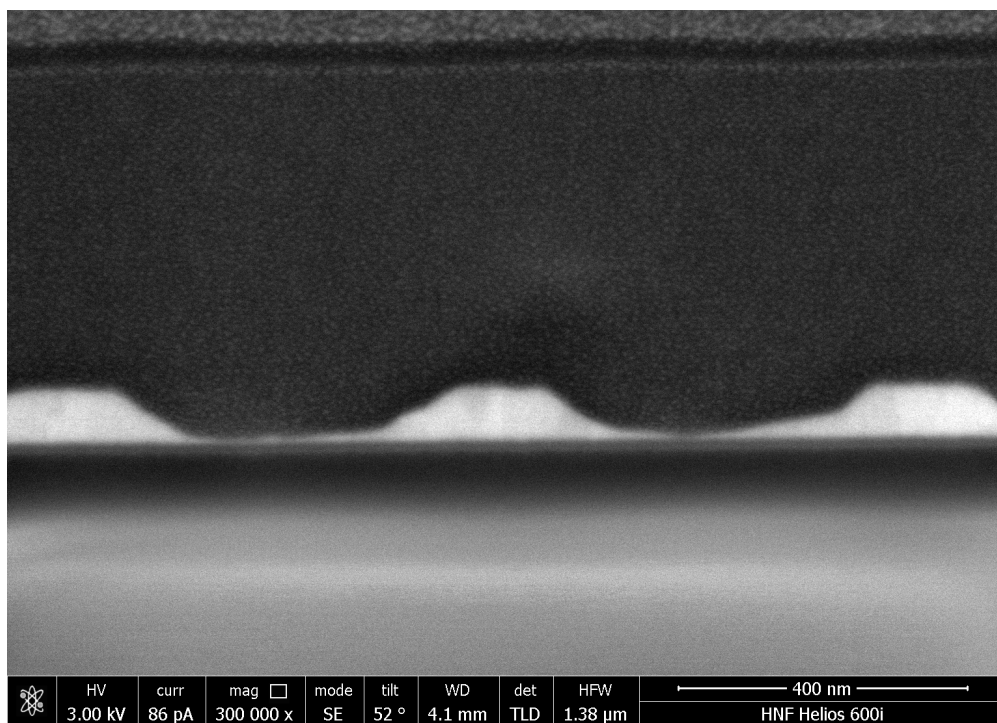

Figure S3: SEM cross-section image of the AuNpA by FIB, Title angle = 52°.

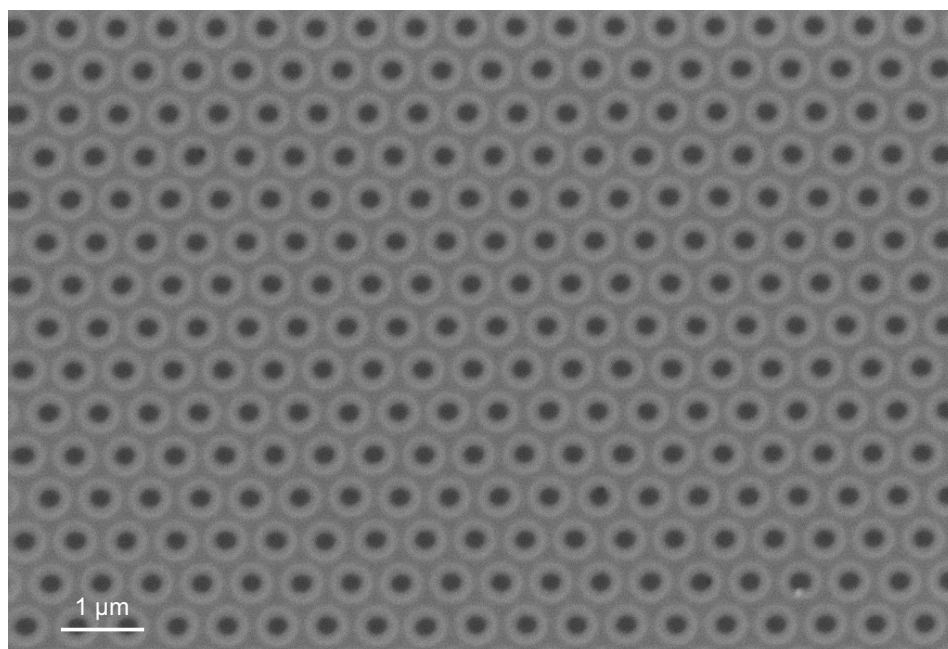

Figure S4: SEM image of the Si/SiO<sub>2</sub> master mold.

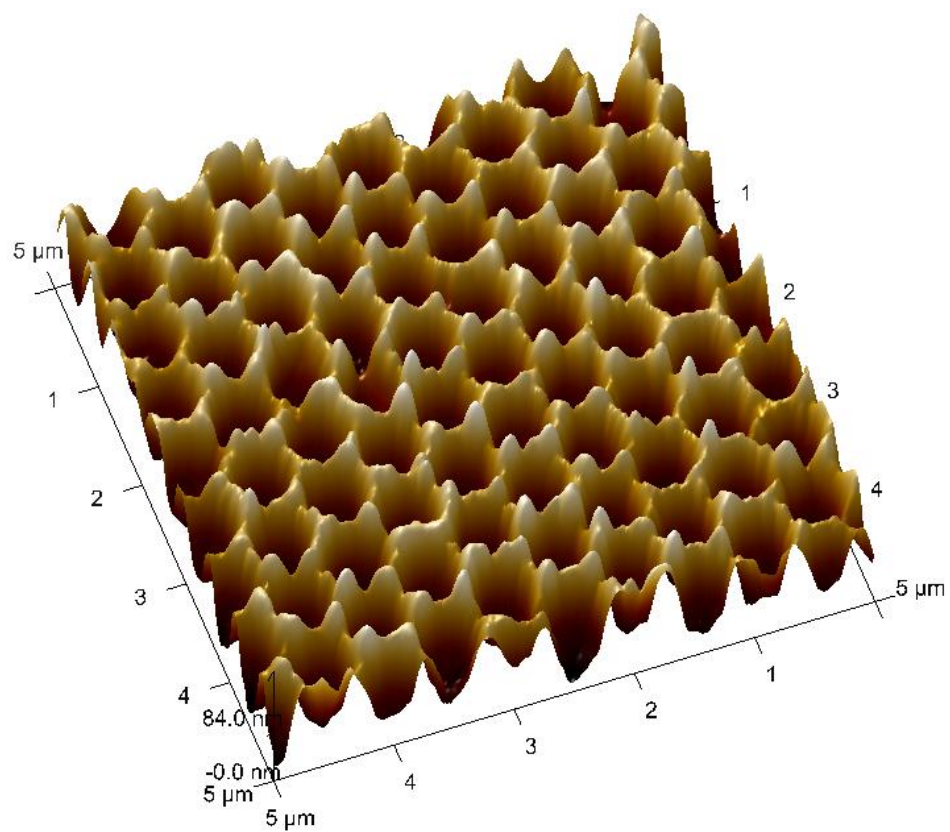

Figure S5: AFM image of the AuNpA with Cr residue before wet etching.

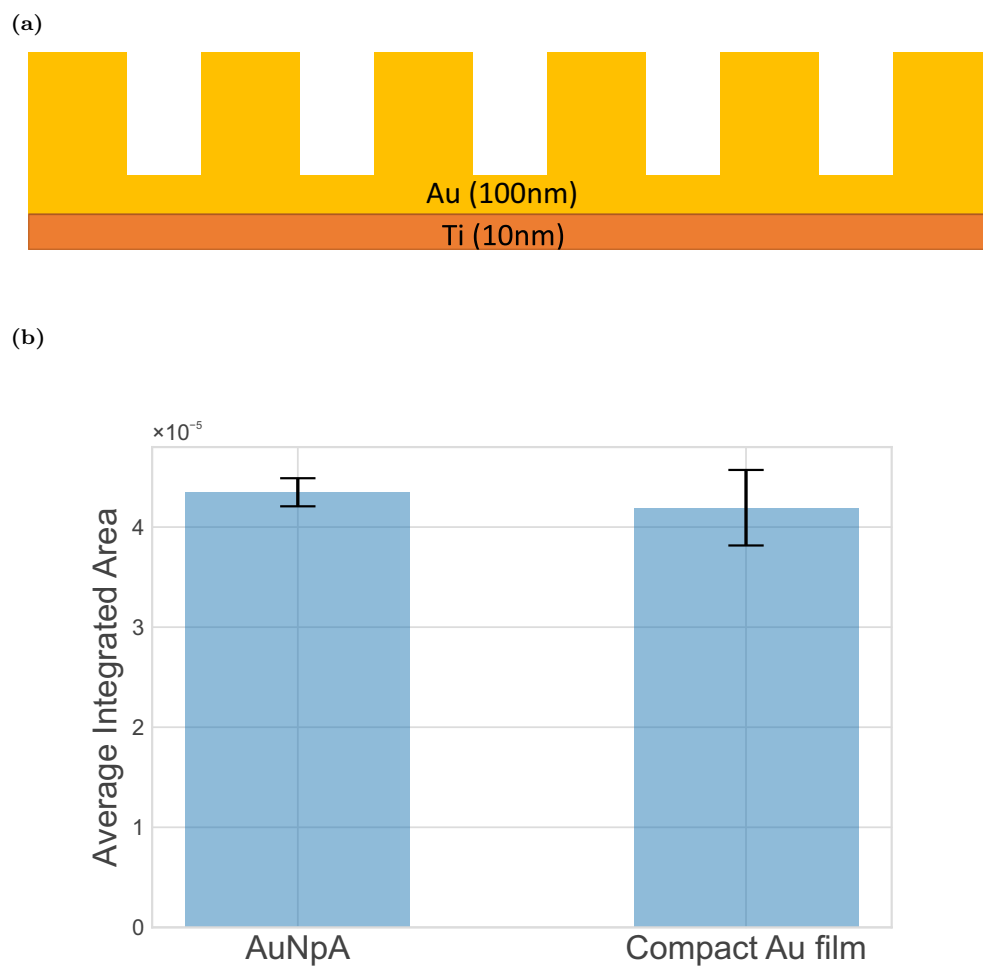

Figure S6: Schematic illustration of the ideal nanopit arrays (a), and experimental ESA comparison of the AuNpA and the compact Au film (b).

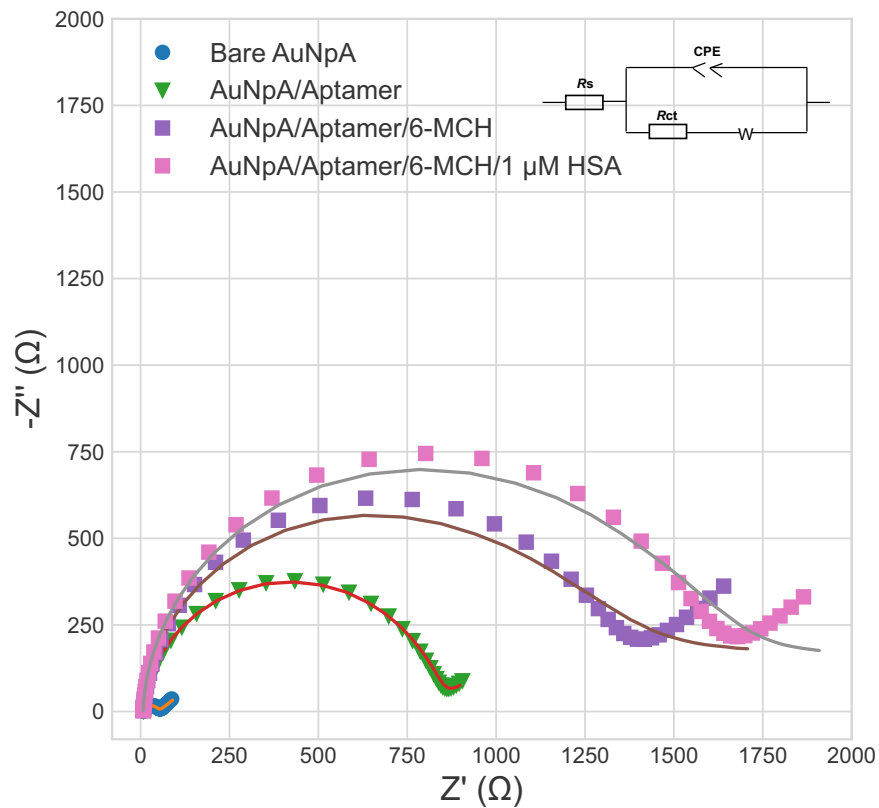

Figure S7: EIS recorded in 5 mM  $[\text{Fe}(\text{CN})_6]^{3-/4-}$  Tris buffer at bare AuNpA, AuNpA/Aptamer, AuNpA/Aptamer/6-MCH and adding 1  $\mu\text{M}$  HSA. Solid lines are fitting results obtained with the model of the top right illustration. The electrical equivalent circuit elements used to fit the impedance measurements are shown in the equivalent Randles circuit and the equivalent circuit model used here comprises a resistor for the intrinsic electrolyte resistance ( $R_s$ ) in series with a parallel constant phase element (CPE), a charge transfer resistance ( $R_{ct}$ ), and Warburg impedance (W).



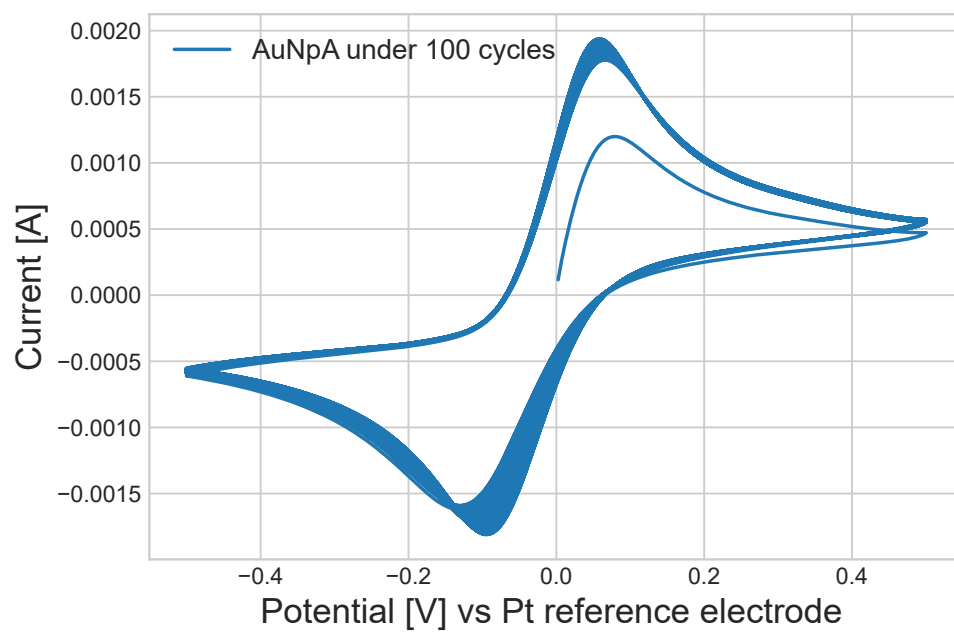

Figure S8: Cyclic voltammetry (100 continuous cycles with scan rate 100 mV/s) in 5 mM  $[\text{Fe}(\text{CN})_6]^{3-/4-}$  Tris buffer using the bare AuNpA as working electrode.

## References

- [1] Iskandar Yahya, Muhamad Azuddin Hassan, Nur Nasyifa Mohd Maidin, and Mohd Ambri Mohamed. Swcnt network-fet device for human serum albumin detection. *Sensors*, 22(21), 2022.
- [2] Wenxiang Xiao, Yaoxin Li, Yinan Xiong, ZhenCheng Chen, and Hua Li. Fluorescence turn-on detection of human serum albumin based on the assembly of gold nanoclusters and bromocresol green. *Analytical and Bioanalytical Chemistry*, 415(17):3363–3374, 2023.
- [3] Wenying Gui, Xueqian Chen, and Qiang Ma. A novel detection method of human serum albumin based on cuinzns quantum dots-co2+ sensing system. *Analytical and Bioanalytical Chemistry*, 409(15):3871–3876, 2017.
- [4] Ali R. Jalalvand, Sirous Ghobadi, Vali Akbari, Hector C. Goicoechea, Elahe Faramarzi, and Majid Mahmoudi. Mathematical modeling of interactions of cabergoline with human serum albumin for biosensing of human serum albumin. *Sensing and Bio-Sensing Research*, 25:100297, 2019.
- [5] Tina Naghdi, Hamed Golmohammadi, Maryam Vosough, Mojgan Atashi, Iman Saeedi, and Mohammad Taghi Maghsoudi. Lab-on-nanopaper: An optical sensing bioplatform based on curcumin embedded in bacterial nanocellulose as an albumin assay kit. *Analytica Chimica Acta*, 1070:104–111, 2019.
